# Supplementary material for: Silicon–Gold Nanoparticles Affect Wharton’s Jelly Phenotype and Secretome during Tri-Lineage Differentiation
Source: MDPI journal article supplement (doi:10.3390/ijms23042134), 2022-02-15
Supplement: s1 [file s1]

**Table S1. Humoral factors measured in MSCs supernatants**

|                                  | Growth factors | Chemokines            | Cytokines                                                                         |
|----------------------------------|----------------|-----------------------|-----------------------------------------------------------------------------------|
| Produced by Warthon's Jelly MSCs | G-CSF          | Fractalkine/CX3CL1    | IL-4                                                                              |
|                                  | VEGF           | GRO/CXCL1             | IL-6                                                                              |
|                                  | GM-CSF         | IL-8/ CXCL8           |                                                                                   |
|                                  | PDGF-AA        | IP10/ CXCL10          |                                                                                   |
|                                  | FGF-2          | MCP-1/CCL2            |                                                                                   |
|                                  |                | MCP-3/ CCL7           |                                                                                   |
|                                  |                | RANTES/CCL5           |                                                                                   |
| Not produced                     | sCD40L         | MDC/ CCL22            | TNF- $\alpha$ ; $\beta$                                                           |
|                                  | EGF            | MIP-1 $\alpha$ / CCL3 | IFN $\alpha$ 2; $\gamma$                                                          |
|                                  | FLT-3L         | MIP-1 $\beta$ / CCL4  | TGF $\alpha$                                                                      |
|                                  | PDGF-AB/BB     | Eotaxin/ CCL11        | IL-1RA                                                                            |
|                                  |                |                       | Interleukins: 1 $\alpha$ ; $\beta$ , 2, 3, 5, 7, 9, 10, 12p40, 12p70, 13, 15, 17A |

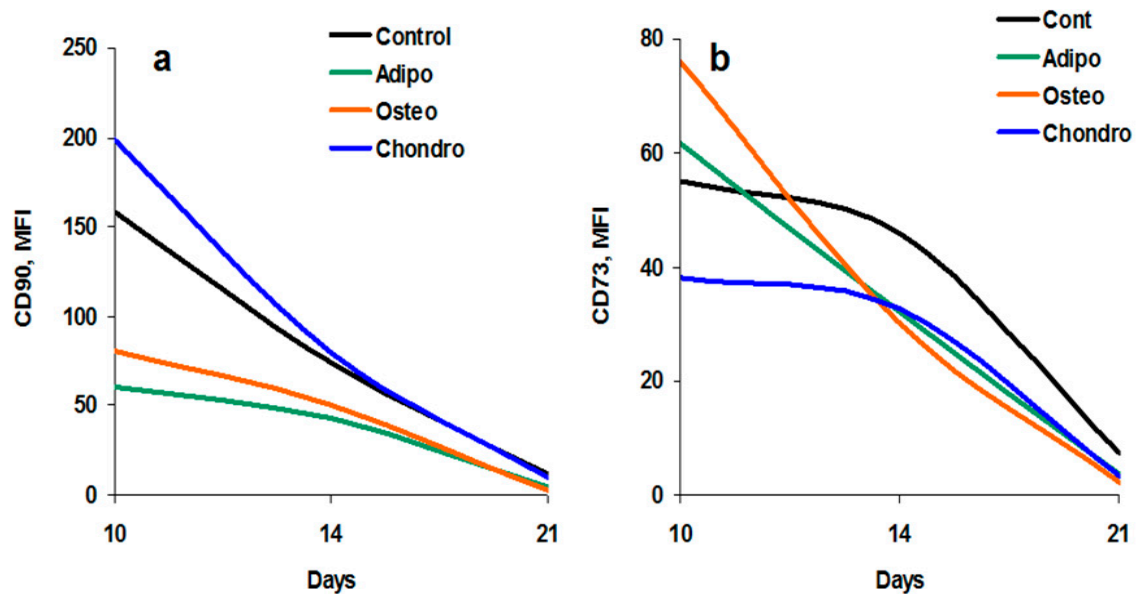

**Figure S1.** Time-dependent expression of MSCs surface markers during adipogenic (Adipo), Osteogenic (Osteo), and chondrogenic (Chondro) differentiation estimated by flow cytometry. MFI designate mean fluorescence intensity. Data are presented for CD90 (a) and CD73 (b) expression. Results are pooled from 2 experiments.

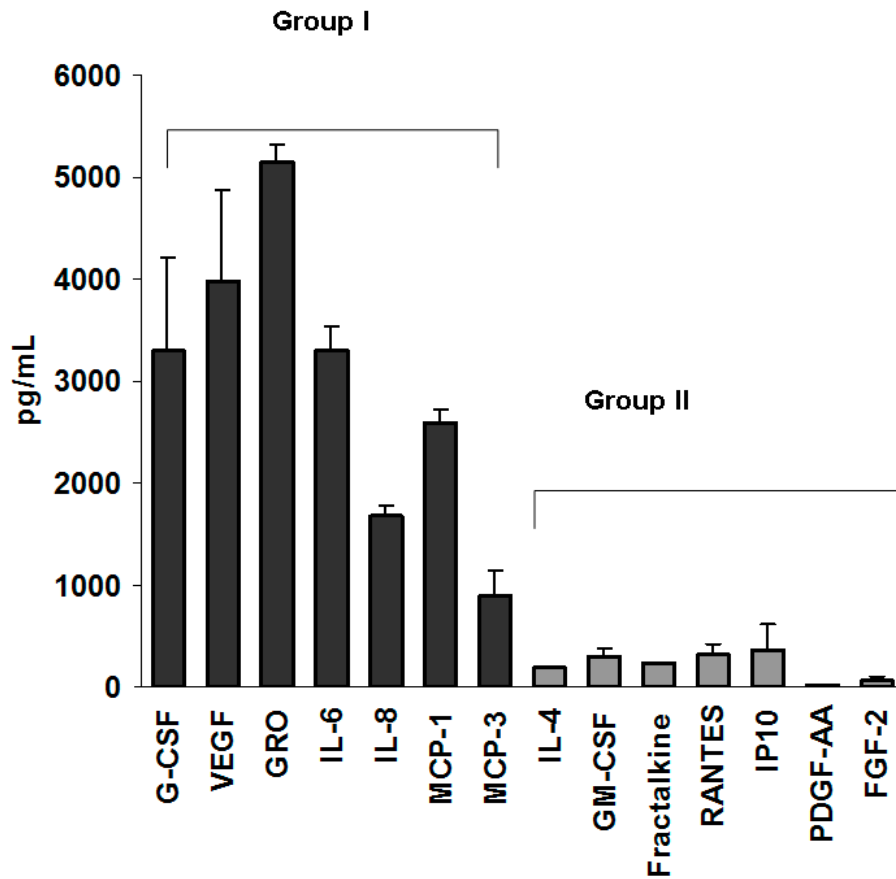

**Figure S2. Concentration of humoral factors stably produced by MSCs.** Results are pooled from 2 experiments.

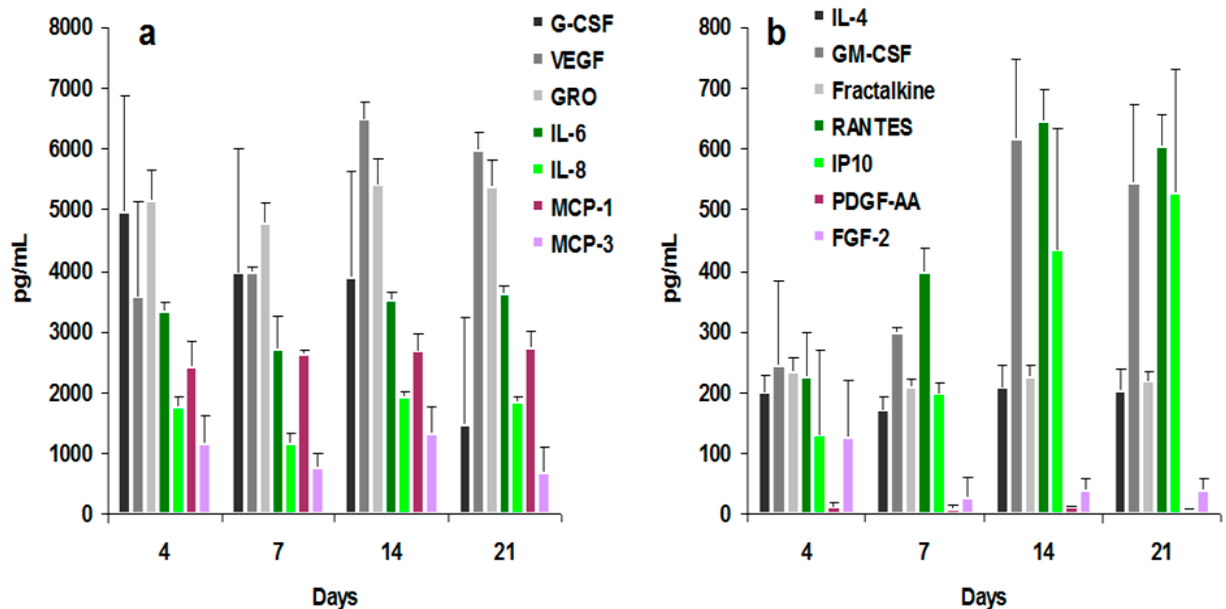

**Figure S3. Time-dependent humoral factor production by unstimulated MSCs.**

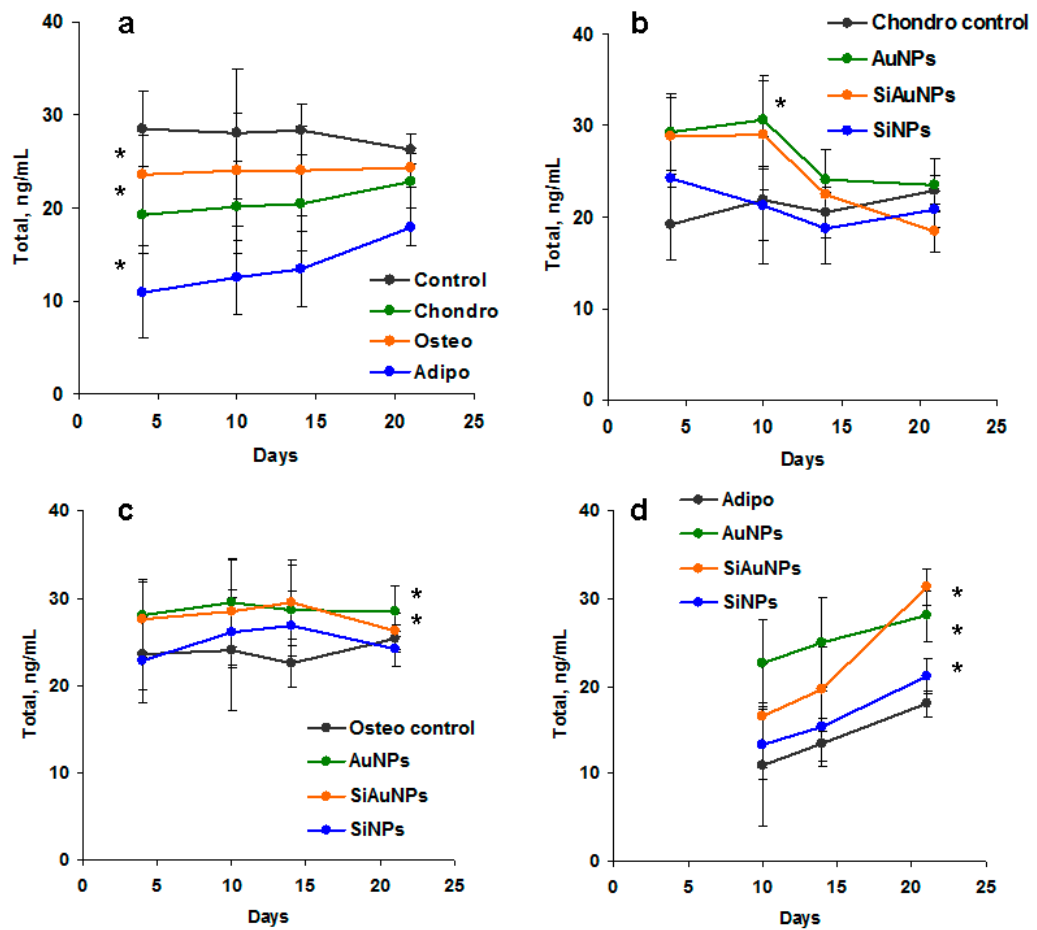

**Figure S4. Total concentration of humoral factors** during MSCs differentiation without NPs (a) and in the presence of NPs during condrogenic (b), osteogenic (c), and adipogenic (d) differentiation. Significant differences are shown with asterisks.

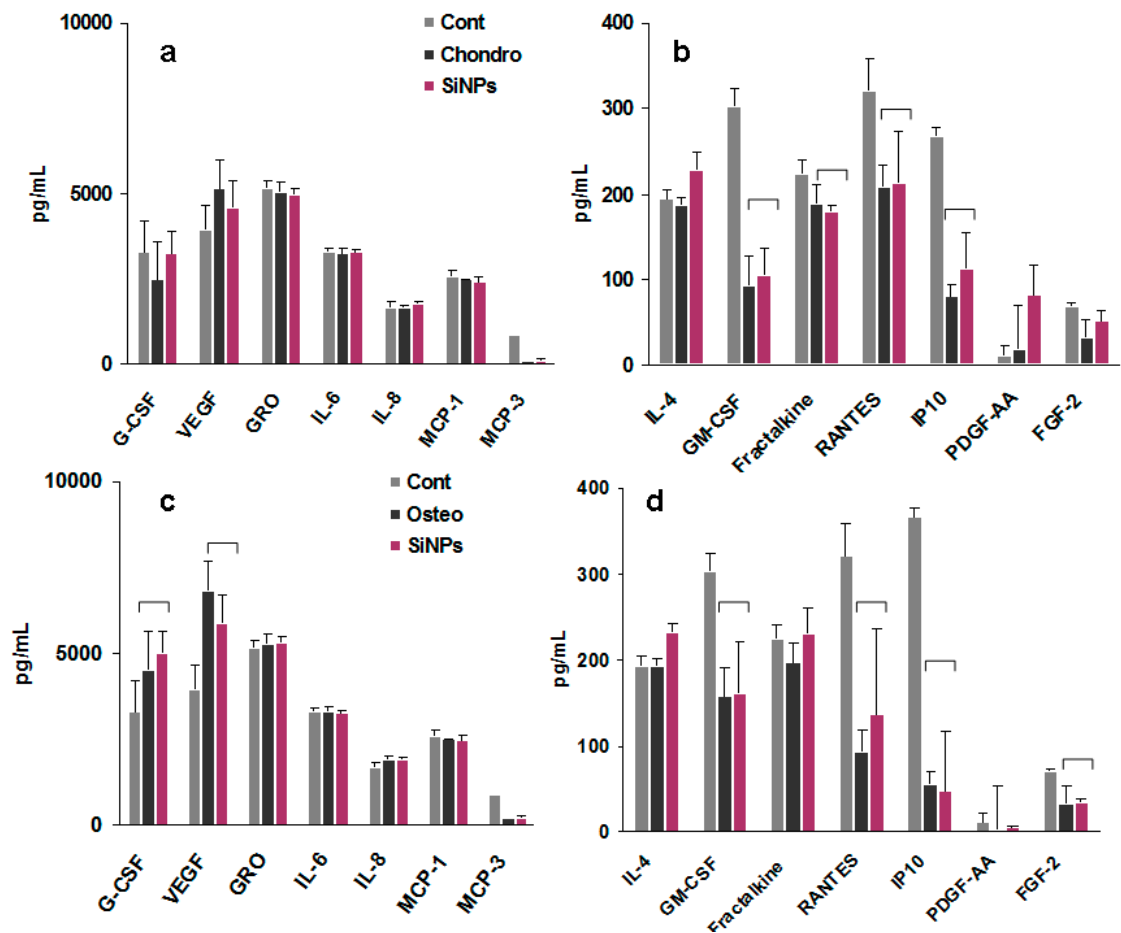

**Figure S5. Effect of SiNPs on soluble factor production by MSCs at 14<sup>th</sup> day of chondrogenic (a) and osteogenic (b) differentiation.** Common effects of differentiating stimuli and SiNPs are shown by brackets.
